# Supplementary material
Source: HighWire-hosted journal article supplement (https://fn.bmj.com/content/103/2/F143)
Supplement: inline-supplementary-material-1 [file inline-supplementary-material-1.docx]

|  | **D0**  *Median (25th-75th perc)* | | | **D3**  *Median (25th-75th perc)* | | | **Evolution of hormone concentrations’ significativity**  **between D0 and D3**  *(Wilcoxon test)* | | |
| --- | --- | --- | --- | --- | --- | --- | --- | --- | --- |
|  | **Group 1** | **Group 2** | **Group 3** | **Group 1** | **Group 2** | **Group 3** | **Group 1** | **Group 2** | **Group 3** |
| **PROG** | - | - | - | 0.761  (*0.564 – 0.994*)  ++; *** | 0.369  (*0.262 – 0.556*) | 0.307  (*0.197 – 0.417*) | *-* | *-* | *-* |
| **DOC** | 0.902  (*0.677 – 1.481*) | 1.110  (*0.776 – 1.652*) | 1.464  (*0.898 – 1.866*) | 0.232  (*0.149 – 0.268*)  *** | 0.146  (*0.112 – 0.262*)  * | 0.104  (*0.091 – 0.131*) | *P<0.01* | *P<0.0001* | *P<0.0001* |
| **B** | 0.857  (*0.530 – 1.424*)  ++; *** | 1.577  (*0.981 – 2.665*) | 1.769  (*1.360 – 2.848*) | 7.042  (*2.759 – 13.870*) | 1.951  (*0.648 – 5.578*) | 1.058  (*0.693 – 3.984*) | *P<0.01* | *P<0.05* | *ns* |
| **18OHB** | 0.754  (*0.367 – 1.091*)  ++; **** | 1.080  (*0.705 – 1.414*)  * | 1.396  (*1.036 – 2.066*) | 8.259  (*3.366 – 10.766*) | 2.498  (*1.761 – 3.798*) | 4.571  (*2.896 – 9.829*) | *P<0.01* | *P<0.0001* | *P<0.0001* |
| **ALDO** | 0.381  (0.267 – 0.495)  ++; **** | 0.540  (*0.331 – 0.669*) | 0.620  (*0.367 – 0.966*) | 0.763  (*0.405 – 1.259*) | 0.412  (*0.191 – 0.826*) | 0.544  (*0.351 – 0.865*) | *P<0.05* | *ns* | *ns* |
| **17OHP** | 13.601  (*7.239 – 17.821*)  **** | 16.057  (*9.264 – 23.688*)  *** | 23.701  (*18.541 – 35.629*) | 3.906  (*3.045 – 5.151*)  **** | 1.418  (*0.944 – 2.452*)  **** | 0.391  (*0.268 – 0.566*) | *P<0.05* | *P<0.0001* | *P<0.0001* |
| **S** | 1.849  (*0.983 – 2.544*)  +; **** | 2.347  (*1.809 – 3.781*)  * | 3.460  (*2.444 – 5.223*) | 2.888  (*1.811 – 3.842*)  **** | 1.753  (*1.397 – 2.291*)  **** | 0.719  (*0.370 – 0.980*) | *ns* | *P<0.05* | *P<0.0001* |
| **F** | 9.7  (*6.1 – 15.3*)  +; **** | 17.2  (*10.6 – 28.4*)  **** | 38.8  (*25.6 – 58.5*) | 85.9  (*47.4 – 130.8*) | 31.3  (*18.3 – 71.4*) | 23.9  (*14.2 – 101.1*) | *P<0.05* | *P<0.01* | *ns* |
| **E** | 59.0  (*19.1 – 90.5*)  ++; **** | 85.0  (*60.7 – 119.2*) | 104.1  (*82.9 –126.6*) | 55.7  (*42.6 – 58.9*) | 40.2  (*26.9 – 47.6*) | 40.8  (*30.8 – 51.4*) | *ns* | *P<0.0001* | *P<0.0001* |
| **∆4** | 0.283  (*0.226 – 0.486*)  **** | 0.393  (*0.251 – 0.514*)  ** | 0.555  (*0.420 – 0.734*) | 1.202  (*0.905 – 3.014*)  + ; **** | 0.605  (*0.400 – 0.875*)  * | 0.297  (*0.228 – 0.513*) | *P<0.01* | *P<0.01* | *P<0.01* |
| **DHEAS** | 638  (*420 – 854*)  **** | 610  (*322 – 944*)  **** | 1159  (*844 – 1462*) | 1043  (*550 – 1301*)  ** | 479  (*204 – 822*) | 195  (*94 – 664*) | *ns* | *ns* | *P<0.0001* |

Kruskal-Wallis tests significativity :

- Group 1 vs 2:

+ : *P < 0.05* ; ++ *P < 0.01*; +++ *P < 0.001*; ++++ *P < 0.0001*

- Group 1 vs 3 and 2 vs 3:

*: *P < 0.05* ; **: *P < 0.01*; ***: *P < 0.001*; ****: *P < 0.0001*
